# Supplementary material
Source: publisher figshare collection journal article supplement (https://acs.figshare.com/ndownloader/files/5640684)
Supplement: Supplementary file 1 [file 5640684]

## Supporting Information

### **Bottom-up Approach Design, Band Structure and Lithium Storage Properties of Atomically Thin $\gamma$ -FeOOH Nanosheets**

Yun Song,<sup>†</sup> Yu Cao,<sup>†</sup> Jing Wang,<sup>†</sup> Yong-Ning Zhou,<sup>†</sup> Fang Fang,<sup>†</sup> Yuesheng Li,<sup>†</sup>  
Shang-Peng Gao,<sup>†</sup> Qin-Fen Gu,<sup>‡</sup> Linfeng Hu,<sup>†</sup> Dalin Sun<sup>†\*</sup>

<sup>†</sup>*Department of Materials Science, Fudan University, Shanghai 200433, P. R. China*

<sup>‡</sup>*Australia Synchrotron, 800 Blackburn Road, Clayton, 3168, Australia*

*\*Corresponding author: dlsun@fudan.edu.cn*

**Table S1.** Structure parameters for  $\gamma$ -FeOOH (JCPDS card, No. 44–1415.  $a = 12.52$  Å,  $b = 3.87$  Å,  $c = 3.07$  Å) showing fractional coordinates ( $x$ ,  $y$ ,  $z$ ) and occupancies ( $g$ ).

| Atom | $x$   | $y$  | $z$ | $g$ |
|------|-------|------|-----|-----|
| Fe   | 0.678 | 0.25 | 0   | 1   |
| O    | 0.282 | 0.25 | 0   | 1   |
| OH   | 0.075 | 0.25 | 0   | 1   |

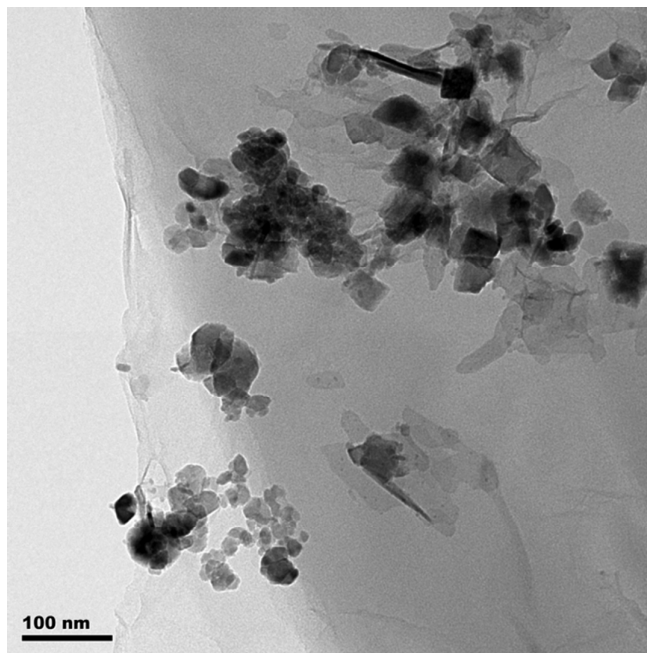

**Figure S1.** TEM image of the product synthesized at a high  $\text{FeCl}_2$  concentration of  $0.6 \text{ g L}^{-1}$ .

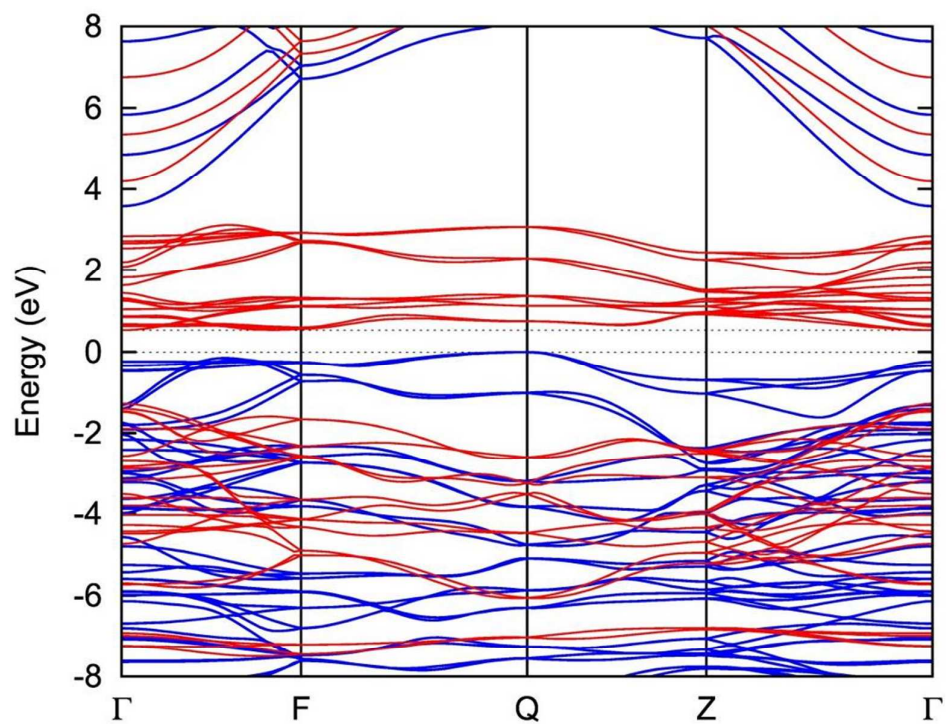

**Figure S2.** Band structure of  $\gamma$ -FeOOH 3D bulk. The Brillouin paths are chosen the same as that of 2D  $\gamma$ -FeOOH nanosheet for a direct comparison.

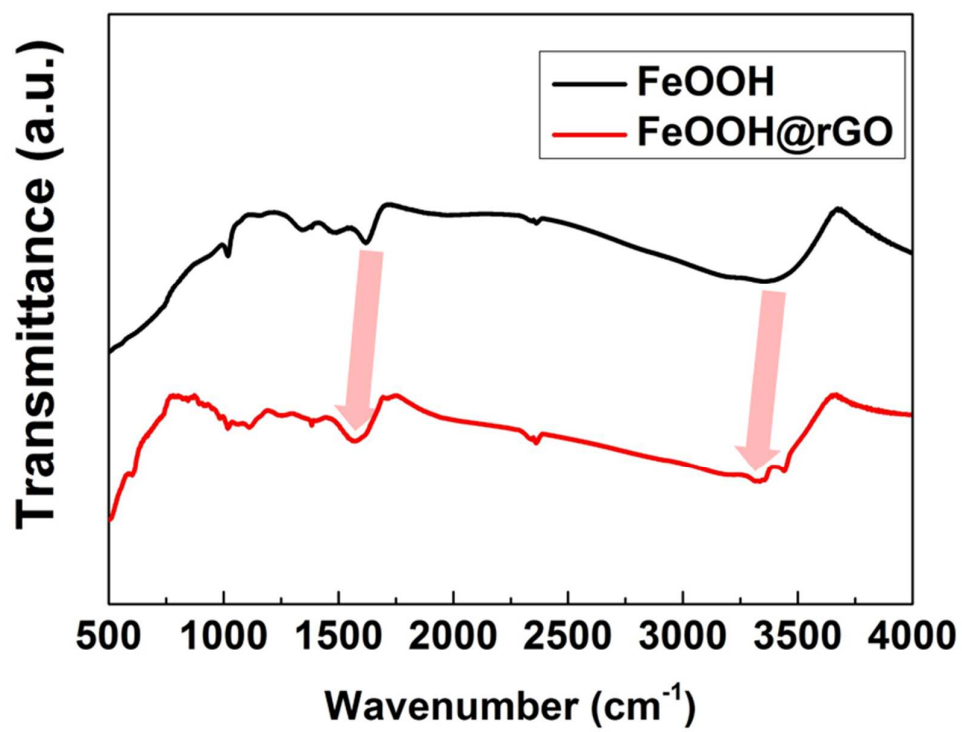

**Fig. S3.** FTIR spectra of FeOOH and FeOOH@rGO composite

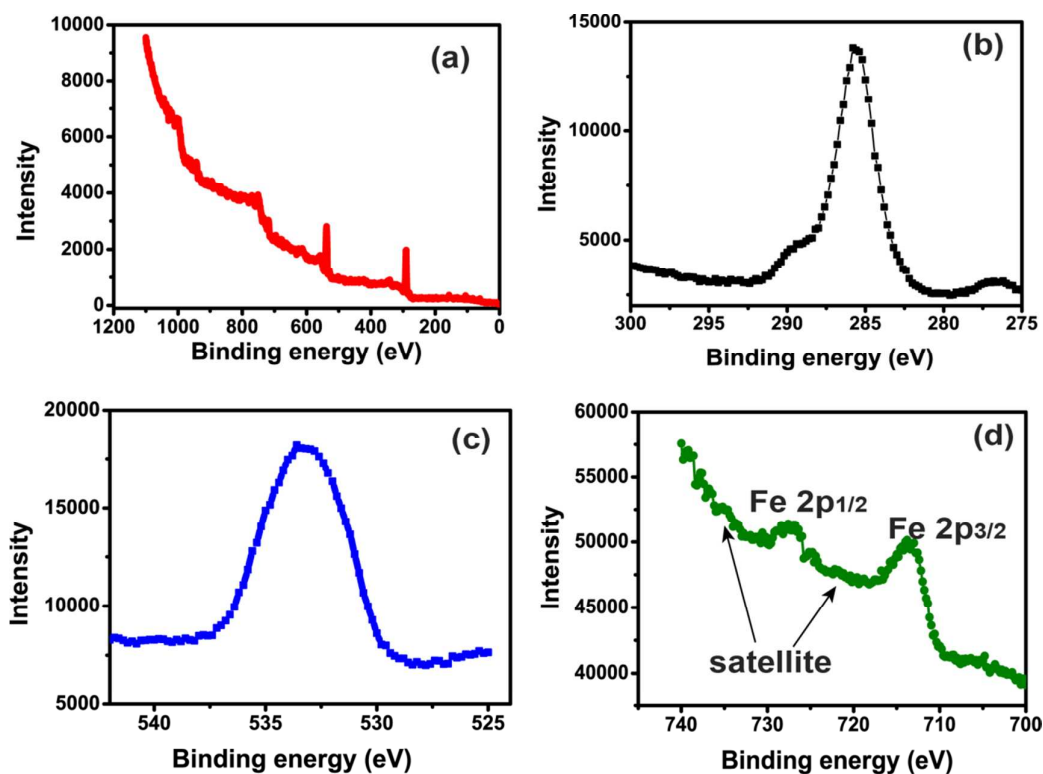

**Figure S4.** XPS spectra of (a)  $\gamma$ -FeOOH@rGO nanocomposites, (b–d) high resolution XPS spectra for C, O and Fe elements, respectively. Two peaks at 713.8 and 727.6 eV can be assigned to Fe 2p<sub>3/2</sub> and Fe 2p<sub>1/2</sub> main peaks, respectively. The appearance of satellite bands near the Fe 2p main peaks is generally regarded as an indicator of the valence state of Fe<sup>3+</sup>.<sup>[1]</sup> In addition, The C1s spectrum of FeOOH@rGO nanocomposites can be resolved into two peaks centered at 284.5 and 287.8 eV, assigning to C-C and C=O bonds, respectively. The intensity of C-C bond is much higher than that of C=O bond, demonstrating the successful reduction of GO into rGO in our process.

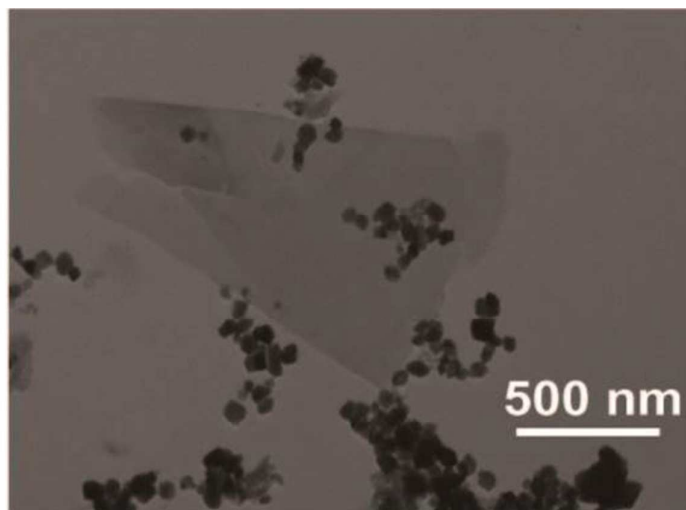

**Figure S5.** The TEM image of the sample prepared by mixing  $\gamma$ -FeOOH nanosheets and GO at a hydrothermal temperature of 170 °C. Higher hydrothermal temperature of 170 °C is disadvantageous for the homogenous dispersion of  $\gamma$ -FeOOH on rGO.

**Table S2.** Comparison of the cycling stability of the as-obtained  $\gamma$ -FeOOH@rGO and previously reported FeOOH-based materials (>50 cycles). This fast activation process of  $\gamma$ -FeOOH@rGO nanocomposites is superior to other reported FeOOH systems, which always suffer from longstanding activation process.

| Anode                                                         | activation<br>cycle<br>number | valley<br>capacity<br>(mAh g <sup>-1</sup> ) | stable<br>capacity<br>(mAh<br>g <sup>-1</sup> ) | fluctuation<br>ratio | Ref                  |
|---------------------------------------------------------------|-------------------------------|----------------------------------------------|-------------------------------------------------|----------------------|----------------------|
| Mn-doped $\alpha$ -FeOOH<br>nanorods                          | ~200                          | ~500                                         | 883                                             | ~43%                 | 2                    |
| $\beta$ -FeOOH nanorods                                       | ~300                          | 285                                          | ~500                                            | ~45%                 | 3                    |
| 10 wt.% graphite<br>doped $\beta$ -FeOOH<br>nanorods          | ~300                          | ~300                                         | ~600                                            | ~50%                 | 3                    |
| amorphous FeOOH<br>particle/rGO                               | ~100                          | ~600                                         | 767                                             | ~21%                 | 4                    |
| <b>ultrathin <math>\gamma</math>-FeOOH<br/>nanosheets@rGO</b> | <b>~10</b>                    | <b>790</b>                                   | <b>860</b>                                      | <b>8%</b>            | <b>This<br/>work</b> |



## REFERENCES

- (1) Ma, R.; Liang, J.; Takada, K.; Sasaki, T. Topochemical Synthesis of Co-Fe Layered Double Hydroxides at Varied Fe/Co Ratios: Unique Intercalation of Triiodide and Its Profound Effect. *J. Am. Chem. Soc.* **2011**, *133*, 613-620.
- (2) Zhai, Y. J.; Ma, X. J.; Mao, H. Z.; Shao, W. W.; Xu, L. Q.; He, Y. Y. Mn-Doped Alpha-FeOOH Nanorods and Alpha-Fe<sub>2</sub>O<sub>3</sub> Mesoporous Nanorods: Facile Synthesis and Applications as High Performance Anodes for LIBs. *Adv. Electron. Mater.* **2015**, *1*, 1400057.
- (3) Yu, L. H.; Xi, S. B.; Wei, C.; Zhang, W. Y.; Du, Y. H.; Yan, Q. Y.; Xu, Z. J. Superior Lithium Storage Properties of Beta-FeOOH. *Adv. Energy Mater.* **2015**, *5*, 1401517.
- (4) Sun, Y.; Hu, X.; Luo, W.; Xu, H.; Hu, C.; Huang, Y. Synthesis of Amorphous FeOOH/Reduced Graphene Oxide Composite by Infrared Irradiation and Its Superior Lithium Storage Performance. *ACS Appl. Mater. Interfaces* **2013**, *5*, 10145-10150.
